# Supplementary material for: Magnetic properties of Sn- and Mn-incorporated Co2TiO4 from single-step calcination
Source: Royal Society of Chemistry journal article supplement (doi:10.1039/d2dt00763k), 2022-01-01
Supplement: d2dt00763k1.pdf [file d2dt00763k1.pdf]

## Electronic Supplementary Information (ESI†)

### Magnetic properties of Sn-and Mn-incorporated $\text{Co}_2\text{TiO}_4$ from single-step calcination

---

#### Table of contents

**Fig. S1** PXRD patterns of coprecipitated precursors of (a) CTO, (b) CSTO, and (c) CMTO.

**Fig. S2** TG traces of coprecipitated precursors of CTO, CSTO, and CMTO.

**Fig. S3** PXRD patterns of (a) CTO, (b) CSTO, and (c) CMTO.

**Fig. S4** SEM image, EDS spectrum, HRTEM image, and SAED pattern of CTO, respectively.

**Fig. S5** SEM-EDS elemental mapping results of (a-e) Overlay, Cobalt, Tin, Titanium, and Oxygen of CSTO and (f-j) Overlay, cobalt, manganese, titanium, and oxygen of CMTO, respectively.

**Fig. S6** (a) Survey XPS spectrum, and core-level spectra of (b) C 1s, (c) O 1s, (d) Co 2p, and (e) Ti 2p of CTO.

**Fig. S7**  $\chi_M^{-1}$  vs. T plot of (a) CTO, (b) CSTO, and (c) CMTO at an applied field of 1000 Oe. Derivative FC data ( $d\chi/dT$  vs. temperature) of (d) CTO, (e) CSTO and (f) CMTO respectively.

**Fig. S8** First derivative plots of heat capacity vs. temperature measured under zero-field (data in red), 500 Oe (data in blue), and 1000 Oe (shown in insets) for (a) CTO, (b) CSTO, and (c) CMTO, respectively.

**Fig. S9** First derivative plots of  $C_p/T$  vs. temperature measured under zero-field (data in black), 500 Oe (data in red), and 1000 Oe (shown in insets) for (a) CTO, (b) CSTO, and (c) CMTO, respectively.

**Table S1** Comparison of EDS and XPS results of CTO and CMTO

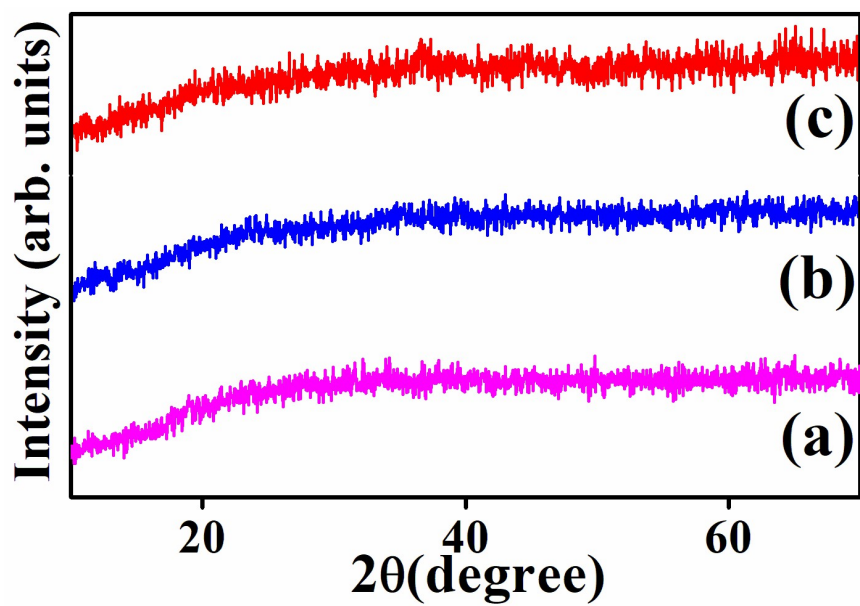

**Fig. S1** Comparative PXRD patterns of coprecipitated precursors of (a) CTO, (b) CSTO, and (c) CMTO, respectively.

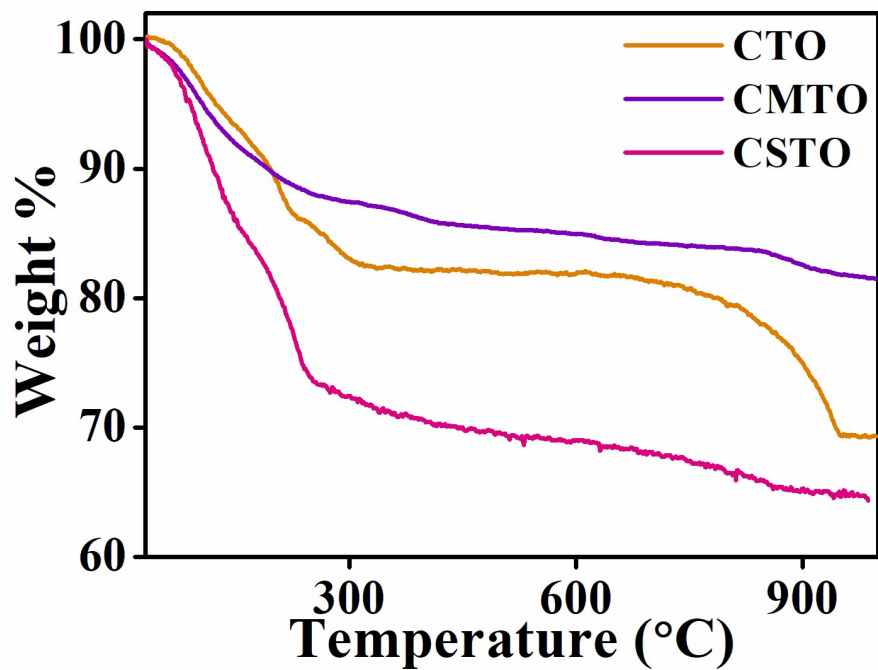

**Fig. S2** Comparative TG traces of coprecipitated precursors of CTO, CSTO, and CMTO

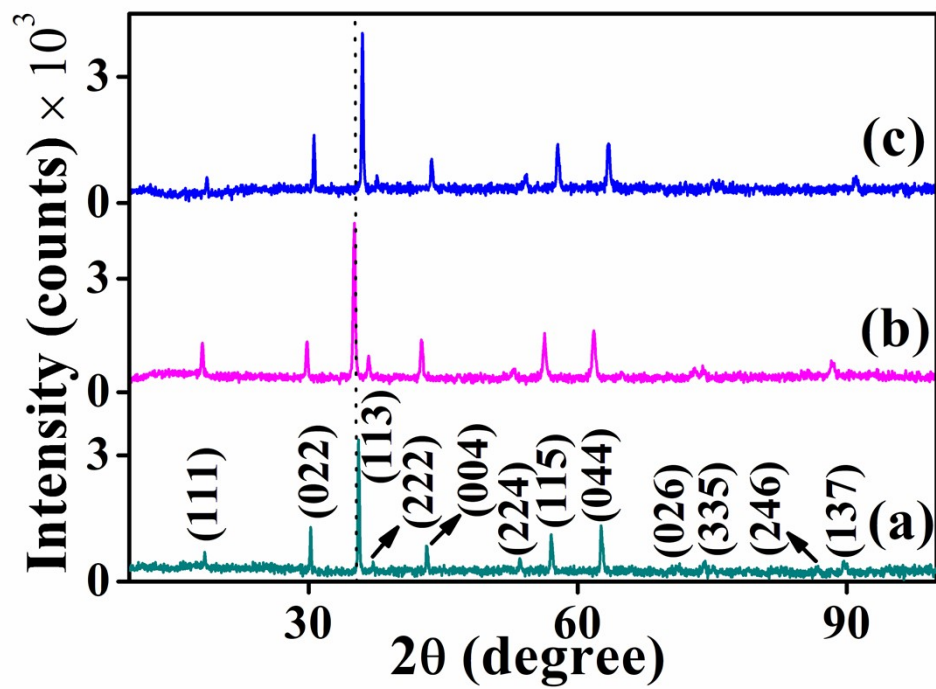

**Fig. S3** Comparative PXRD pattern of (a) CTO, (b) CSTO, and (c) CMTO, respectively.

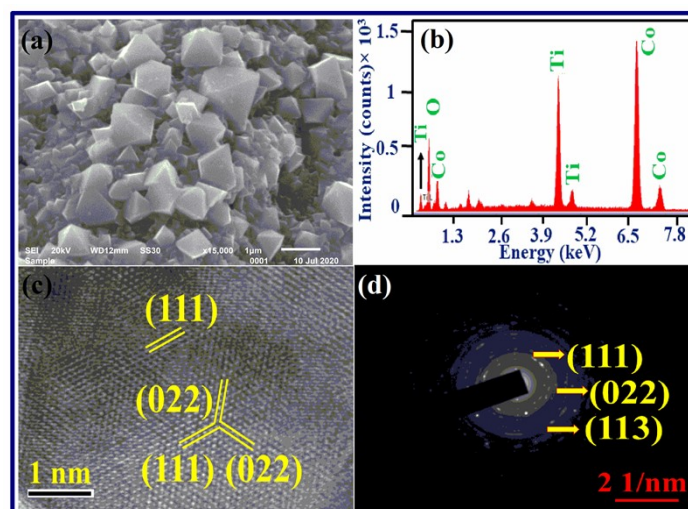

**Fig. S4**(a) SEM image, (b) EDS spectrum, (c) HRTEM image, and (d) SAED pattern of CTO, respectively.

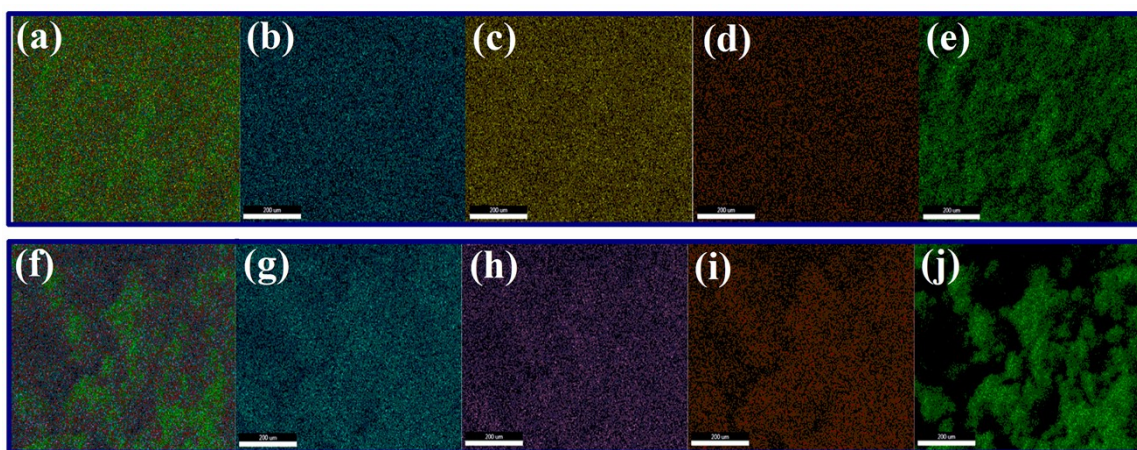

**Fig. S5** SEM-EDS elemental mapping results of (a-e) Overlay, cobalt, tin, titanium, and oxygen of CSTO and (f-j) Overlay, cobalt, manganese, titanium, and oxygen of CMTO, respectively.

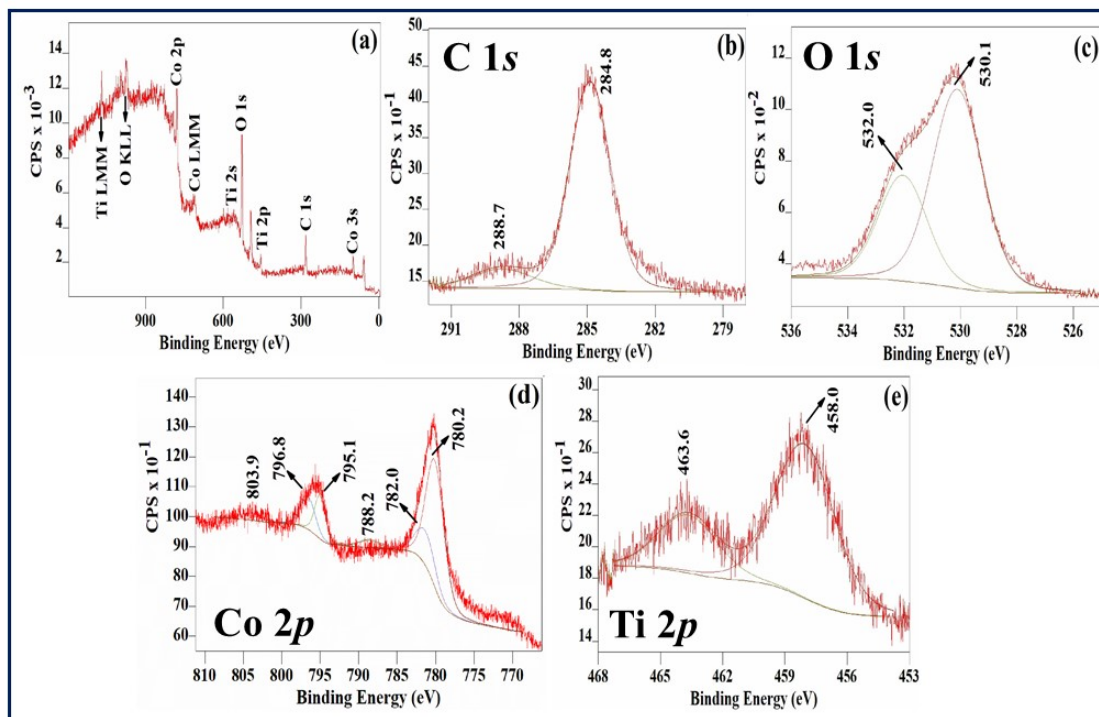

**Fig. S6**(a) Survey XPS spectrum, and core-level spectra of (b) C *1s*, (c) O *1s*, (d) Co *2p*, and (e) Ti *2p* of CTO.

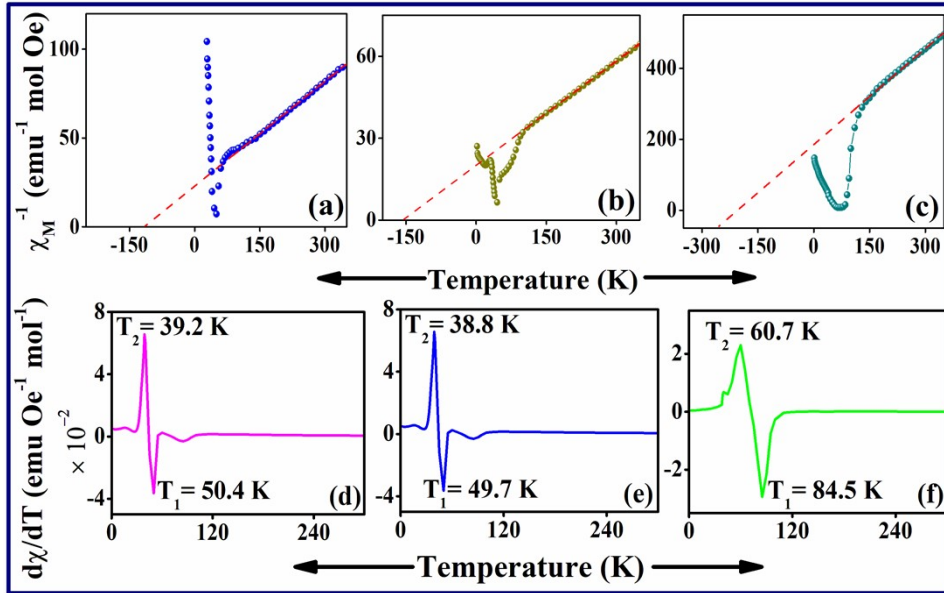

**Fig. S7**  $\chi_M^{-1}$  vs. T plot of (a) CTO, (b) CSTO, and (c) CMTO at an applied field of 1000 Oe. Derivative FC data ( $d\chi/dT$  vs. temperature) of (d) CTO, (e) CSTO and (f) CMTO respectively.



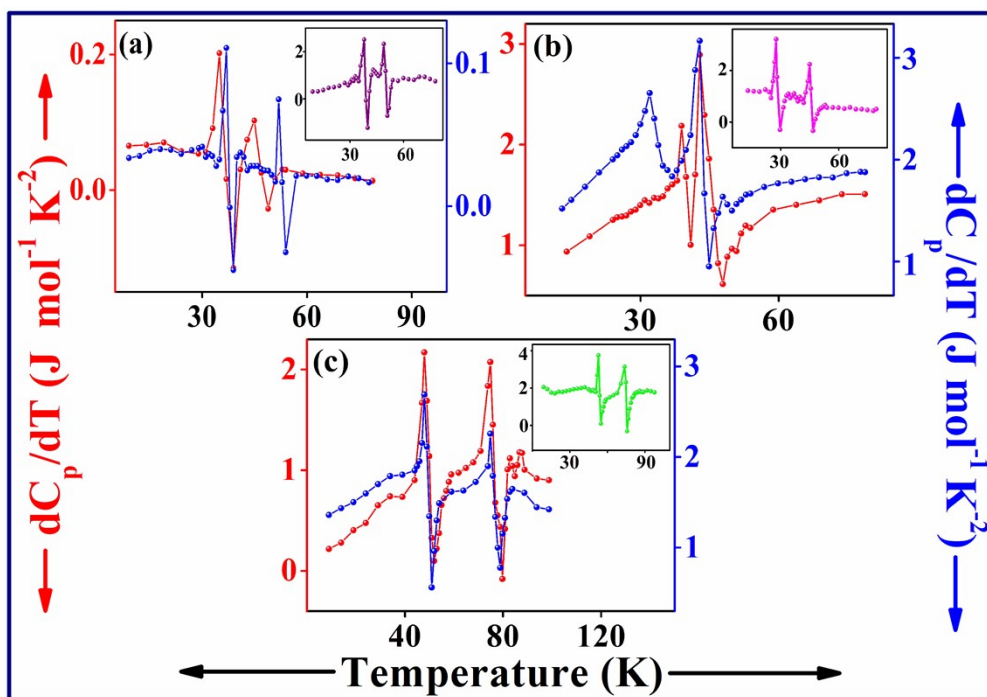

**Fig. S8** First derivative plots of heat capacity vs. temperature measured under zero-field (data in red), 500 Oe (data in blue), and 1000 Oe (shown in insets) for (a) CTO, (b) CSTO, and (c) CMTO, respectively.

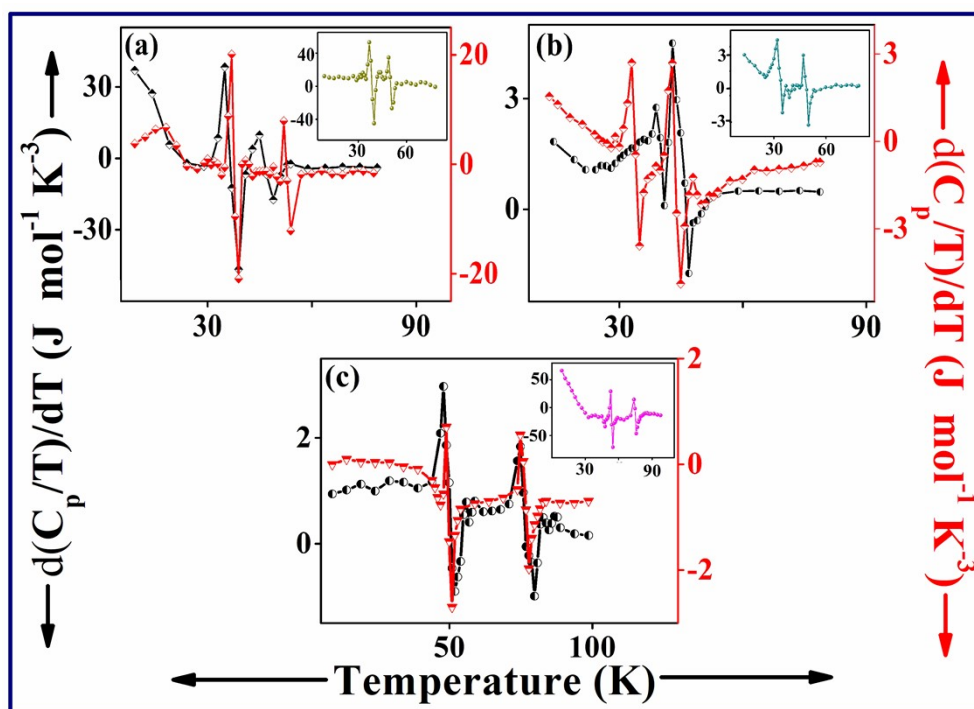

**Fig. S9** First derivative plots of  $C_p/T$  vs. temperature measured under zero-field (data in black), 500 Oe (data in red), and 1000 Oe (shown in insets) for (a) CTO, (b) CSTO, and (c) CMTO, respectively.

**Table S1** Comparison of atomic percentages of CTO and CMTO from EDS and XPS analysis.

| <b>Sample</b> | <b>EDS (atomic %)</b> | <b>XPS (atomic %)</b> |
|---------------|-----------------------|-----------------------|
| <b>CTO</b>    | Co- 28.6              | Co- 28.4              |
|               | Ti- 14.3              | Ti- 14.4              |
|               | O- 56.8               | O- 57.1               |
| <b>CMTO</b>   | Co- 29.5              | Co- 28.2              |
|               | Mn- 7.1               | Mn- 6.9               |
|               | Ti- 7.2               | Ti- 7.1               |
|               | O- 56.1               | O- 57.6               |
